# Supplementary material for: Defining the Risk and Associated Morbidity and Mortality of Severe Respiratory Syncytial Virus Infection Among Infants with Congenital Heart Disease
Source: Springer Nature journal article supplement (doi:10.1007/s40121-016-0142-x), 2017-01-09
Supplement: MOESM1 [file 11986986]

Supplementary Information: Data Extraction Table

| Study Details |                              | Methodology |                                   |              |                          | Population                                                    |                                                 |                                          |                     |          |                            |                                                                                                                                                                                                                                          |                                                                                                                                                                                         | Quality Scores |           |       |
|---------------|------------------------------|-------------|-----------------------------------|--------------|--------------------------|---------------------------------------------------------------|-------------------------------------------------|------------------------------------------|---------------------|----------|----------------------------|------------------------------------------------------------------------------------------------------------------------------------------------------------------------------------------------------------------------------------------|-----------------------------------------------------------------------------------------------------------------------------------------------------------------------------------------|----------------|-----------|-------|
|               | Citation                     | Country     | Study Design                      | Intervention | Duration                 | Inclusion criteria                                            | Exclusion criteria                              | Disease status                           | N                   | Gender   | Mean age at admission      | Outcomes relating to RSV                                                                                                                                                                                                                 | Conclusions                                                                                                                                                                             | Evidence Level | Item Bank | JADAD |
| 1             | Altman et al. 2000.          | USA         | Prospective single centre study   | None         | 1994-1996                | Patients with cardiac disease with RSVH                       | Patients with non-significant cardiac diagnoses | Virologically confirmed RSV infection    | 1091 RSVH           | NR       | 16 months. 61% > 12 months | 63/1091 (6%) of children with RSVH had hsCHD. 5/63 (7.9%) infants had >1 RSVH in the same RSV season. 1 death was reported.                                                                                                              | RSV remains an issue for children with hsCHD into the second year of life, impacting perioperative surgery management in CHD children.                                                  | 1              | 10        | NA    |
| 2             | Baysal et al. 2013.          | Turkey      | Prospective single centre study   | None         | NR                       | Children <2 years old diagnosed with LRTI                     | NR                                              | NR                                       | 419                 | NR       | NR                         | 241/419 (57.5%) hospitalized patients had hsCHD. CHD carried a hospitalization rate of 14%. Average LOS was 9.9 days and 30% of RSV-CHD patients were admitted to PICU. 1 death was recorded.                                            | RSV is a substantial cause of morbidity in children with CHD in developing countries.                                                                                                   | 1              | 3*        | NA    |
| 3             | Bonillo Perales et al. 2000. | Spain       | Prospective single centre study   | None         | 1997-2000                | All neonatal infants                                          | None                                            | Bronchiolitis admission                  | 12,895              | NR       | 3.1 months                 | 455/12,895 neonates (3.52%) were hospitalized for bronchiolitis. The incidence rate in infants with CHD was 9.8% vs 3.18% in term infants.                                                                                               | Neonatal mechanical ventilation, BPD and CHD are more closely linked to RSV bronchiolitis admission than wGA.                                                                           | 1              | 10        | NA    |
| 4             | Boyce et al. 2000.           | USA         | Retrospective multicentre study   | None         | 1989-1993                | Children <3 years old enrolled at birth in Tennessee Medicaid | NR                                              | Confirmed RSV or bronchiolitis infection | 248,652 child-years | M: 51%   | <3 years                   | A rate of 81.6 RSVH per 100 child years in infants <12 months old was reported. Infants with BPD, CHD, other conditions or preterm birth had a higher risk of RSV.                                                                       | Children <24 months with BPD have high rates of RSVH. After the first year, children with CHD or prematurity have similar rates to low risk infants <12 months old.                     | 3              | 11        | NA    |
| 5             | Butt et al. 2014.            | Canada      | Retrospective single centre study | Prophylaxis  | 2003-2009                | Children with CHD and RSVH                                    | RSV not primary admission diagnosis             | Confirmed RSV infection                  | 30                  | M: 53.3% | 15.1 months                | 12/30 (40%) of cardiac patients with RSVH had hsCHD, and 27/30 (90%) had acyanotic disease. 4 had received prophylaxis. 53.3% were admitted to PICU for a median of 11 days. 1 death was reported.                                       | 185 infants ≤2 years with hsCHD received prophylaxis. Breakthrough RSV infections occurred in 2.2%, demonstrating good efficacy of palivizumab in this population.                      | 3              | 11        | NA    |
| 6             | Byington et al. 2015         | USA         | Retrospective multicentre study   | None         | 2000-2011 (sporadically) | Children <2 years with an ICD-9-CM code                       | NR                                              | ICD codes for RSV                        | Total: 872,658      | NR       | NR                         | 70-77% of RSV-associated mortality in the KID datasets and 61-71% in the PHIS datasets occurred between November-March. The majority of deaths occurred in infants aged ≤12 months (85% in the KID dataset and 77% in the PHIS dataset). | RSVH and mortality have decreased in the 21st century. Infants, especially those with complex chronic conditions, represent the majority of RSV-associated deaths in the United States. | 2              | 11        | NA    |

|    |                           |             |                                   |             |                        |                                                                                                  |                            |                                       |                                         |          |                   |                                                                                                                                                                                                                                                          |                                                                                                                                                                         |   |    |    |
|----|---------------------------|-------------|-----------------------------------|-------------|------------------------|--------------------------------------------------------------------------------------------------|----------------------------|---------------------------------------|-----------------------------------------|----------|-------------------|----------------------------------------------------------------------------------------------------------------------------------------------------------------------------------------------------------------------------------------------------------|-------------------------------------------------------------------------------------------------------------------------------------------------------------------------|---|----|----|
| 7  | Chang et al. 2010.        | USA         | Retrospective multicentre study   | Prophylaxis | 2000-2002<br>2004-2006 | Discharge data on RSVH in children <2 years before and after palivizumab prophylaxis introduced. | Patients with missing data | ICD codes for RSV                     | Total 53,207 RSVH                       | NR       | NR                | 3.0% of RSVH were in children with CHD, and 0.5% in those with hsCHD. 5 deaths were reported in CHD RSV children. Approximately 7 fewer RSVHs/year were reported in CHD infants after prophylaxis introduced.                                            | Prophylaxis had a limited effect on the number of RSVHs in infants with hsCHD, suggesting that further investigation is warranted.                                      | 2 | 11 | NA |
| 8  | Cilla et al. 2006.        | Spain       | Retrospective single centre study | None        | 1996-2000              | Children <2 years old admitted for acute, community-acquired RSV infection                       | NR                         | Confirmed RSV infection               | 357                                     | M: 53.5% | NR                | Associations were found between RSV and maternal age, CHD, suburban residence, and birth between July-December. 8/357 (2.2%) had congenital cardiac malformations.                                                                                       | Infants with has CHD have increased risk of RSVH                                                                                                                        | 3 | 10 | NA |
| 9  | Duppenthaler et al. 2004. | Switzerland | Prospective multicentre study     | None        | 1997-2003              | Children with CHD <2 years old admitted for RSV infection                                        | NR                         | Confirmed RSV infection               | Total 729                               | NR       | NR                | 10/729 (1.4%) of patients had CHD. Hospitalization rates in CHD patients <12 months were 2.0/100 child years, and 0.5/100 child years in children 12-24 months old (corresponding to 1.2 and 0.2 in children without CHD). 1 death was reported.         | RSVH rates in children <24 months with CHD were lower than previous reports from the USA: the risk was only two times greater in children with CHD compared to non-CHD. | 1 | 10 | NA |
| 10 | Eriksson et al. 2002.     | Sweden      | Prospective single centre study   | None        | 1987-1998              | All children hospitalized for RSV infection                                                      | NR                         | Virologically confirmed RSV infection | 1354                                    | M: 54%   | Median 2.7 months | Hospitalization rates across the RSV seasons varied from 28-64% for infants with CHD compared to 0.8-1.4% in infants without risk factors. Complications resulting in PICU admission were more common in infants with risk factors.                      | The study found lower population rates of RSVH and complications than previously reported.                                                                              | 3 | 10 | NA |
| 11 | Fjaerli et al. 2004.      | Norway      | Retrospective multicentre study   | None        | 1993-2000              | Children <2 years old admitted to hospital with bronchiolitis                                    | NR                         | Confirmed RSV infection               | 764                                     | M: 63%   | Median 6 months   | 93% of infants had 1 hospitalization; 7% had ≥2 hospitalizations. Mean annual hospitalization rates were 21.7/1000 children <1 year and 14.1/1000 children <2 years. 77 children belonged to ≥1 high-risk groups, e.g. preterm birth, DS and CHD.        | RSVH rates and outcomes were in agreement with other studies. Hospital LOS and morbidity was high in preterm children, children with CHD and children with DS.          | 3 | 11 | NA |
| 12 | Friedman et al. 2016.     | USA         | Retrospective multicentre study   | None        | 1997-2012              | Children 12-23 months admitted for RSV                                                           | NR                         | ICD codes for RSV                     | 1,085,181 CHD ICD-9 codes and 4468 RSVH | NR       | NR                | Children with CHD had a mean RSVH LOS of 4.4 days versus 2.3 days without CHD. Mechanical ventilation and inpatient mortality were higher for children with CHD (11.4% and 1.6%, respectively) than children without CHD, (2.3% and 0.1%, respectively). | In the second year of life, several specific CHD diagnoses were associated with substantial risk for RSVH, mechanical ventilation, and mortality.                       | 2 | 10 | NA |
| 13 | Granbom et al. 2014.      | Sweden      | Prospective multicentre study     | Prophylaxis | 2010-2012              | Children with CHD <2 years hospitalized for RSV                                                  | NR                         | ICD codes for RSV                     | 219                                     | NR       | NR                | The calculated RR of children with CHD experiencing RSVH was 2.06 (95% CI 1.6–2.6; p < 0.0001) compared with children without CHD.                                                                                                                       | Having CHD increased the rate and estimated RR of RSVH in these children.                                                                                               | 2 | 10 | NA |

|    |                                   |         |                                   |                   |           |                                                                                                          |      |                                                                                                       |                                  |                                            |                                                     |                                                                                                                                                                                                                                                                                                                                                                                                                                                      |                                                                                                                                                                                                                                      |   |    |    |
|----|-----------------------------------|---------|-----------------------------------|-------------------|-----------|----------------------------------------------------------------------------------------------------------|------|-------------------------------------------------------------------------------------------------------|----------------------------------|--------------------------------------------|-----------------------------------------------------|------------------------------------------------------------------------------------------------------------------------------------------------------------------------------------------------------------------------------------------------------------------------------------------------------------------------------------------------------------------------------------------------------------------------------------------------------|--------------------------------------------------------------------------------------------------------------------------------------------------------------------------------------------------------------------------------------|---|----|----|
| 14 | Grimaldi et al 2002.              | France  | Retrospective multicentre study   | None              | 1999-2000 | Infants with RSVH                                                                                        | NR   | Confirmed RSV infection                                                                               | 484                              | M: 59.6%                                   | 5 months                                            | 13/484 (2.7%) of infants with RSVH had CHD. Multivariate analysis showed 3 significant independent factors associated with risk of ICU admission for RSV: preterm birth <32 weeks (OR = 0.86 [0.75-0.98]), neonatal respiratory distress (OR = 4.23 [1.31 to 13.03]) and CHD (OR = 5.26 [1.02 to 21.01]).                                                                                                                                            | At risk populations for severe RSV bronchiolitis with PICU admission should include all very preterm infants with respiratory distress syndrome.                                                                                     | 1 | 10 | NA |
| 15 | Hervás et al. 2012.               | Spain   | Retrospective single centre study | None              | 1995-2006 | Children <2 years hospitalized for acute bronchiolitis                                                   | NR   | ICD-9 codes for acute bronchiolitis ; RSV bronchiolitis ; RSV pneumonia; RSV not otherwise specified. | 2384                             | M: 58%                                     | 3.9 months                                          | 77% of admissions were in infants aged <6 months. 62.7% of bronchiolitis admissions were for RSV. The majority of RSVH occurred between November and March. RSV was associated with increased LOS, increased risk of ICU admission, and oxygen use.                                                                                                                                                                                                  | Preterm infants of <32 wGA, CHD, and atelectasis/condensation were main risk factors for ICU admission in both RSV and non-RSV bronchiolitis. RSV bronchiolitis seems to be a more severe disease than that caused by other viruses. | 3 | 11 | NA |
| 16 | Khongphatthanayothin et al. 1999. | USA     | Retrospective multicentre study   | Surgical outcomes | 1990-1995 | All children with discharge diagnoses of CHD and RSV receiving cardiac surgery <6 months after infection | NR   | Virologically confirmed RSV infection                                                                 | 25                               | Male Group 1: 53.8%<br>Male Group 2: 66.7% | Group 1: median 86 days<br>Group 2: median 116 days | Group 1 patients had cardiac surgery while symptomatic for RSV. Two patients died and 17 cases of postoperative complications were reported: pulmonary hypertension, adult respiratory distress syndrome, tracheal stenosis, ventricular dysfunction, secondary infection, pericardial effusion and deep vein thrombosis. Group 2 patients had surgery <i>after</i> RSV infection. None died, and only 2 cases of minor complications were reported. | Cardiac surgery performed while symptomatic for RSV is associated with high risk of post-operative complications. Risk increases with earlier surgery.                                                                               | 4 | 9  | NA |
| 17 | Kristensen et al. 2012.           | Denmark | Retrospective multicentre study   | None              | 1997-2003 | Birth cohort of Danish children <2 years                                                                 | None | ICD codes for RSV                                                                                     | 452, 205                         | NR                                         | NR                                                  | 12,498/452,205 (2.8%) were RSVH. 2720 infants had CHD, of which 292 (10.7%) were RSVH. Hospital LOS was increased in children with CHD.                                                                                                                                                                                                                                                                                                              | Chronic disease is an important risk factor of RSVH                                                                                                                                                                                  | 2 | 10 | NA |
| 18 | Kristensen et al. 2009.           | Denmark | Retrospective multicentre study   | None              | 1996-2003 | Children <14 years with ICD coded cardiac malformations or other heart disease                           | None | Confirmed RSV infection                                                                               | 3239 children with heart disease | Female: 52.7%                              | 362 days                                            | 331/3239 (10.2%) of children with heart disease had a positive RSV test. Multivariate analyses showed that DS, cardiomyopathy and hsCHD were predictors of RSVH                                                                                                                                                                                                                                                                                      | Incidence rate of RSVH in children <24 months with heart disease was 56.5/1000 child-years                                                                                                                                           | 2 | 12 | NA |
| 19 | Lanari et al. 2004.               | Italy   | Prospective multicentre study     | None              | 1999-2000 | Cohort of children <2 years hospitalized for LRTI                                                        | None | NR                                                                                                    | 1214                             | NR                                         | NR                                                  | 42/1214 (3.5%) infants hospitalized for RSV had non-surgically corrected CHD, and were associated with increased hospital LOS and oxygen therapy. Nosocomially acquired RSV infection was higher in CHD than in non-CHD infants (9.8% vs 2.9%).                                                                                                                                                                                                      | Infants with CHD have a high risk of nosocomially acquired RSV infection.                                                                                                                                                            | 3 | NA | NA |

|    |                      |        |                                 |                          |           |                                                                                                                                         |                                                                                   |                                                                                 |                                               |                                                            |                                                             |                                                                                                                                                                                                                                                                                                                                                                                                   |                                                                                                                                                                                                            |   |    |    |
|----|----------------------|--------|---------------------------------|--------------------------|-----------|-----------------------------------------------------------------------------------------------------------------------------------------|-----------------------------------------------------------------------------------|---------------------------------------------------------------------------------|-----------------------------------------------|------------------------------------------------------------|-------------------------------------------------------------|---------------------------------------------------------------------------------------------------------------------------------------------------------------------------------------------------------------------------------------------------------------------------------------------------------------------------------------------------------------------------------------------------|------------------------------------------------------------------------------------------------------------------------------------------------------------------------------------------------------------|---|----|----|
| 20 | Li et al. 2016.      | Canada | Prospective multicentre study   | Prophylaxis              | 2005-2015 | Infants <24 months with hsCHD who had received prophylaxis were recruited                                                               | None                                                                              | Confirmed RSV infection                                                         | 1st year of life: 1380; 2nd year of life: 529 | 1st year of life: 53.3% male; 2nd year of life: 52.6% male | 1st year of life: 4.2 months; 2nd year of life: 17.8 months | Infants prophylaxed in their second year had a more complicated neonatal course, with significantly longer LOS (51.2 versus 24.9 days) compared with those in the first year. The respiratory hospitalization and RSVH rates in the first and second years were 11.2%; 10.6% and 2.3%; 1.7% respectively.                                                                                         | Infants in the first and second year of life had a similar RSVH hazard. This suggests that infants in the second year with hsCHD, who remain unstable, are equally at risk for RSVH and merit prophylaxis. | 1 | 11 | NA |
| 21 | Meberg et al. 2006.  | Norway | Prospective single centre study | Costs of hospitalization | 1987-2004 | Cohort of live born infants                                                                                                             | None                                                                              | Confirmed RSV infection                                                         | 43,470 total                                  | NR                                                         | NR                                                          | 527/43,470 (1.2%) of infants born at the hospital had CHD. All were < 2 years old. 500 were exposed to RSV. RSVH was significantly higher in CHD vs non-CHD children (4.8% vs 2%), and increased to 9.2% in severe CHD.                                                                                                                                                                           | For better cost-effectiveness, RSV prophylaxis should only be considered in infants with severe CHD.                                                                                                       | 1 | 10 | NA |
| 22 | Meberg et al. 2000.  | Norway | Prospective single centre study | None                     | 1982-1996 | Cohort of live born infants                                                                                                             | None                                                                              | None                                                                            | 35,218                                        | NR                                                         | NR                                                          | 360/35218 (1%) of infants had CHD. At follow-up, 154/360 (42.8%) were spontaneously cured, 42/360 (11.7%) had died (over half within 28 days of birth).                                                                                                                                                                                                                                           | There is broad variety in CHD severity.                                                                                                                                                                    | 1 | 10 | NA |
| 23 | Medrano et al. 2007. | Spain  | Prospective multicentre study   | None                     | 2004-2005 | Children with hsCHD <24 months of age followed through the RSV season                                                                   | Nosocomial RTI infections; children with HIV; children involved in other studies. | ICD codes for RSV                                                               | 760                                           | Male RTI 60.8%                                             | 6.4 months                                                  | 79 patients were hospitalized for respiratory infections, with an incidence rate of 21.4/1000 patient-months. Rates were higher in infants <6 months of age. RSV was the most commonly identified viral pathogen (23.8% of cases)                                                                                                                                                                 | RTI hospitalization in infants with hsCHD is mainly associated with non-cardiac conditions. RSV was the most commonly identified causative agent.                                                          | 1 | 10 | NA |
| 24 | Medrano et al. 2010  | Spain  | Prospective multicentre study   | None                     | 2004-2008 | Children < 24 months of age diagnosed with ARI with hsCHD                                                                               | hnsCHD; HIV; involvement in other clinical trials; nosocomial ARIs                | Confirmed RSV infection and physical examination to provide a respiratory score | Total 2613                                    | M: 56.1%                                                   | 6.72 months                                                 | 96 patients required RSVH with a 3.8% specific admission rate. RSV was identified in 102 admissions, representing 27.1% of total. CHD was not classified as a risk factor.                                                                                                                                                                                                                        | Hospital admission rate and severity of ARI are important issues in hsCHD. RSV was the most common etiologic agent found in children requiring hospital admission for ARI.                                 | 1 | 10 | NA |
| 25 | Pezzotti et al. 2009 | Italy  | Retrospective multicentre study | None                     | 2000-2006 | Cohort of preterm infants (<36 wGA) born in the study catchment area, limited to bronchiolitis admission within first 18 months of life | Death; incomplete records                                                         | ICD-9 codes for bronchiolitis                                                   | 2,407                                         | Bronchiolitis males: 62%                                   | 64% < 6 months                                              | 137/2407 (5.7%) preterm infants were hospitalized with bronchiolitis by 18 months of age, with an overall incidence rate of 4.70/100 person-years. Bronchiolitis incidence was higher <6 months of age, and through the months of Oct-Apr. The following risk factors were identified: mothers with low education level (≤ 8 years); male gender; low birth weight, <32 wGA; Apgar score ≤7; BPD. | Incidence of hospitalization for bronchiolitis and associated risk factors in Italy are similar to other countries. Highlights need for public health measures to reduce health disparities.               | 2 | 11 | NA |

|    |                      |               |                                   |      |           |                                                                              |                                                                                                                                                                         |                                                                                 |                                             |                                                |                                                      |                                                                                                                                                                                                                                                                                                                                                                                          |                                                                                                                                                                                   |   |    |    |
|----|----------------------|---------------|-----------------------------------|------|-----------|------------------------------------------------------------------------------|-------------------------------------------------------------------------------------------------------------------------------------------------------------------------|---------------------------------------------------------------------------------|---------------------------------------------|------------------------------------------------|------------------------------------------------------|------------------------------------------------------------------------------------------------------------------------------------------------------------------------------------------------------------------------------------------------------------------------------------------------------------------------------------------------------------------------------------------|-----------------------------------------------------------------------------------------------------------------------------------------------------------------------------------|---|----|----|
| 26 | Resch et al. 2011    | Austria       | Retrospective single centre study | None | 2004-2009 | Infants with RSVH                                                            | Nosocomial RSV infections                                                                                                                                               | ICD-10 codes and confirmed RSV                                                  | 388                                         | NR                                             | NR                                                   | CHD was a common risk for RSVH in infants, reported in 50/388 (12.9%) patients.                                                                                                                                                                                                                                                                                                          | RSVH is linked to greater hospital LOS and oxygen use compared to infants with influenza                                                                                          | 2 | 2* | NA |
| 27 | Resch et al. 2016    | Austria       | Retrospective single centre study | None | 2004-2008 | Children with CHD                                                            | Death, admission for heart surgery, loss to follow up, closure of patient ductus arteriosus during neonatal period                                                      | ICD-10 codes                                                                    | 602                                         | M: 53%                                         | Median of 2 months                                   | 451/602 (74.9%) of patients had hnsCHD and 151/602 (25.1%) had hsCHD. 58/602 (9.6%) were RSVH with a seasonal peak in January (25.9% of RSVH). hnsCHD were significantly younger than hsCHD. Nearly all RSVH occurred during 1st year of life                                                                                                                                            | RSV burden measured by RSVH was high for both hsCHD and hnsCHD with a more severe course of disease in children with hsCHD. Early surgery reduces RSVH during the 1st RSV season. | 1 | 11 | NA |
| 28 | Simoes et al. 1998   | USA           | Prospective multicentre study     | None | 1992-1995 | Children <48 months with CHD or cardiomyopathy                               | Immuno-deficiency; previous reaction to blood products; poor venous access; renal failure; ventilator dependency, <6 m life expectancy, candidates for heart transplant | Confirmed RSV infection and physical examination to provide a respiratory score | RSV-ISIG: 202 Control Group: 214 Total: 416 | Both group- Male: 53%                          | RSV-ISIG: 9.3 months Control Group: 10.7 months      | 32/214 (15.0%) in the control group were hospitalized with RSV as compared to 21/202 (10.5%) of the children receiving RSV-IGIV. 26 deaths (13 in each group) occurred during the trial in which there was no statistical significance                                                                                                                                                   | No significance of RSV-IGIV in preventing RSVH in children with CHD was seen.                                                                                                     | 1 | 13 | 3  |
| 29 | Spaeder et al. 2011  | USA           | Retrospective single centre study | None | 2002-2007 | <18 years old who had undergone cardiac surgery                              | Patients who had undergone orthotopic heart or lung transplant.                                                                                                         | Confirmed RSV infection                                                         | 774                                         | Viral season: M - 59% Non-viral season: M- 57% | Viral season: 9.5 months Non-viral season: 11 months | 13/774 (17.5%) patients had viral respiratory infections, of which 9 occurred in the viral season and 4 during the non-viral season. 5/9 cases in the viral season were due to RSV as well as 1 patient who had RSV and influenza A. Only 1/4 patients had RSV from the non-viral season group                                                                                           | Children with viral respiratory infection have significantly worse outcomes than matched controls. Viral respiratory infection is associated with increased hospital LOS.         | 3 | 10 | NA |
| 30 | Straňák et al. 2016. | Multinational | Prospective multicentre study     | None | 2013-2014 | Preterm infants (33-35 wGA) ≤ 6 months of age at the onset of the RSV season | BPD; CLD; hsCHD; immunoprophylaxis                                                                                                                                      | Confirmed RSV infection                                                         | 2390                                        | Male RSV: 57.8% Male non-RSV: 63%              | NR                                                   | 204/2390 infants were hospitalized for LRTI during the study. 64/204 infants were RSV positive. The RSVH rate was 4.1%, rising to 6.1% during the RSV season. Family smoking; hnsCHD; maternal age ≤ 25 years at delivery; low maternal educational level; children aged 4-5 years in the household ; age ≤ 3 months on 1 October; and paternal atopy were identified as risks for RSVH. | This study adds to evidence from single-country studies regarding RSV risk factors in preterm infants.                                                                            | 1 | 11 | NA |

|    |                        |        |                                 |                                                                       |           |                                         |                                                  |                         |      |        |                          |                                                                                                                                                                                                                                                                                                                                                                                                                                 |                                                                                                                                                                                                                                                                                           |   |    |    |
|----|------------------------|--------|---------------------------------|-----------------------------------------------------------------------|-----------|-----------------------------------------|--------------------------------------------------|-------------------------|------|--------|--------------------------|---------------------------------------------------------------------------------------------------------------------------------------------------------------------------------------------------------------------------------------------------------------------------------------------------------------------------------------------------------------------------------------------------------------------------------|-------------------------------------------------------------------------------------------------------------------------------------------------------------------------------------------------------------------------------------------------------------------------------------------|---|----|----|
| 31 | Tatochenko et al. 2010 | Russia | Prospective multicentre study   | None                                                                  | 2008-2009 | Children <2 years hospitalized for LRTI | Prophylaxis or participation in a clinical trial | Confirmed RSV infection | 519  | M: 61% | 8.8 months               | 197/519 (38%) of children tested RSV positive. The RSV season began in late October. Peak activity occurred in early April, when 62% of children tested RSV positive. High risk RSV positive children had increased hospital LOS and oxygen supplementation versus other RSV positive children (28% vs 10%).                                                                                                                    | The prevalence of serious RSV infections in the Russian Federation is similar to that in other temperate zones of the northern hemisphere.                                                                                                                                                | 1 | 10 | NA |
| 32 | Thorburn et al. 2004   | UK     | Prospective single centre study | Strict basic droplet precautions and RSV testing on admission to PICU | 2002      | All children admitted to PICU           | NR                                               | Confirmed RSV infection | 154  | NR     | RSV negative: 2.6 months | 54/154 patients were RSV-positive, of which 39 were positive on PICU admission and 15 became RSV positive within PICU. 16/54 RSV-positive patients had CHD with additional diseases such as CLD.                                                                                                                                                                                                                                | Children with CHD as well as CLD, airway abnormalities and immunosuppression are at increased risk of nosocomial RSV. Basic droplet precautions help control the spread of RSV infection                                                                                                  | 1 | 9  | NA |
| 33 | Thorburn. 2009.        | UK     | Prospective/retrospective study | Mortality                                                             | 1999-2007 | Children admitted to the PICU with RSV  | NR                                               | Confirmed RSV infection | 2009 | NR     | NR                       | 98.5% of 406 RSV-positive patients admitted to PICU required mechanical ventilation; 35 children died. Overall PICU RSV mortality was 8.6% vs a hospital RSV mortality rate of 1.7%. 18 deaths were directly RSV-related (PICU 4.4%; hospital 0.9%). 17 died from other causes after becoming RSV negative. Mortality risk factors were pre-existing disease (RR 2.36), cardiac anomaly (RR 2.98) and nosocomial RSV (RR 2.89). | Pre-existing disease/co-morbidity is associated with a significantly higher risk of death from severe RSV infection. Nosocomial RSV infection is an additional major risk factor for death in children with severe RSV infection.                                                         | 3 | 8  | NA |
| 34 | Tulloh et al. 2011     | USA    | Prospective multicentre trial   | None                                                                  | 2003-2005 | Children with hsCHD                     | NR                                               | NR                      | 183  | NR     | 1-10 months              | 20/183 (10.9%) had an RSV infection and therefore cardiac surgery (shunts, single ventricle physiology or cardiac morphology) was delayed for 6 weeks                                                                                                                                                                                                                                                                           | RSV infection <6 weeks before cardiopulmonary bypass causes significant morbidity. RSV groups had longer duration of medication, possibly representing respiratory dysfunction several months post-infection                                                                              | 2 | 7* | 2  |
| 35 | Vo et al. 2012         | Canada | Retrospective multicentre study | None                                                                  | 1996-1997 | Children <2 years old with CHD          | None                                             | ICD code 9              | 3223 | NR     | NR                       | 19/3223 (0.6%) had RSVH and 417/3223 (12.9%) LRTI hospitalization before 2 years old. Before age 10, 58.5% of CHD children with LRTI in infancy were diagnosed with chronic respiratory morbidity higher than that of CHD children without LRTI in infancy (31.5%). IRRs were higher for males (2.0) than females (1.6) for chronic respiratory morbidity.                                                                      | CHD children hospitalized for LRTI in infancy are at almost twice the risk of childhood chronic respiratory morbidity compared to CHD children not hospitalized for LRTI. LRTI hospitalization impact is not limited to perinatal period of CHD infants but impacts throughout childhood. | 3 | 9* | NA |

|    |                         |         |                                 |      |           |                                                                                                                       |                                     |                         |      |           |                                                                           |                                                                                                                                                                                                                                                                                                                                                       |                                                                                                                                                                                       |   |    |    |
|----|-------------------------|---------|---------------------------------|------|-----------|-----------------------------------------------------------------------------------------------------------------------|-------------------------------------|-------------------------|------|-----------|---------------------------------------------------------------------------|-------------------------------------------------------------------------------------------------------------------------------------------------------------------------------------------------------------------------------------------------------------------------------------------------------------------------------------------------------|---------------------------------------------------------------------------------------------------------------------------------------------------------------------------------------|---|----|----|
| 36 | von Renesse et al. 2009 | Germany | Prospective multicentre study   | None | 1999-2005 | RSV patients                                                                                                          | None                                | Confirmed RSV infection | 1541 | NR        | Median - ventilated mechanically 4.2 months<br>Control group - 4.8 months | 1541 patients had 1568 RSV infections. 60% of the group ventilated mechanically had ≥1 additional risk factor for severe infection (prematurity 50%, CLD 20%, CHD 35%, and immunodeficiency 20%)                                                                                                                                                      | Children treated by long term mechanical ventilation may acquire RSV infection via transmission by droplets or caregivers and face increased risk of severe course of RSV infections. | 1 | 10 | NA |
| 37 | Wang et al. 1997.       | Canada  | Prospective multicentre study   | None | 1993      | Children <2 years with RSVH; any children with RSVH and underlying cardiac or pulmonary disease, or immunosuppression | Patients >2 years with only asthma  | Confirmed RSV infection | 689  | NR        | 9.1 months (median 4.9 months)                                            | Mean LOS for RSVH was 7 days; 110 patients were admitted to ICU, 63 were supported by mechanical ventilation, and 6 died. Aboriginal race (defined by maternal race), history of apnea or respiratory arrest during acute illness before hospitalization, and pulmonary consolidation as shown at admission were identified as relevant risk factors. | Patients with underlying diseases and, possibly, those of aboriginal race should be targeted for RSV vaccine trials.                                                                  | 1 | 11 | NA |
| 38 | Willson et al. 2003     | USA     | Retrospective multicentre study | None | 1995-1996 | Infants <1 year hospitalized with bronchiolitis or RSV pneumonia                                                      | Cost outliers; transferred patients | ICD-9 codes             | 684  | Male: 58% | Mean 3.4 months                                                           | 79% of hospitalized infants had ≥1 complication. This increased to 87% in preterm infants, 93% in those with CHD, and 90% in infants with congenital abnormalities relative to those with no risk factors (76%). Infants of 33-35 wGA had the highest complication rate (93%). Complications involved increased LOS, PICU admission, and costs.       | Complications, particularly in preterm infants, are common in RSVH and are linked to longer hospitalization outcomes and costs                                                        | 3 | 9  | NA |

\* Conference abstract

ARI: acute respiratory infection; BPD: bronchopulmonary dysplasia; CHD: congenital heart disease; CLD: chronic lung disease; hnsCHD: hemodynamically non-significant CHD; hsCHD: hemodynamically significant CHD; DS: Down syndrome; GA: gestational age; HIV: Human Immunodeficiency Virus; ICD: International Classification of Diseases; ICU: intensive care unit; IRR: incidence rate ratio; LOS: length of stay; LRTI: lower respiratory tract infection; OR: odds ratio; PICU: pediatric intensive care unit; RR: relative risk; RSV: respiratory syncytial virus; RSVH: respiratory syncytial virus hospitalizations; RSV-IVIG: intravenous RSV immunoglobulin; RTI: respiratory tract infection; wGA: weeks' gestational age
